# Supplementary material for: Dependence of the irradiation conditions and crystalline phases of TiO2 nanoparticles on their toxicity to Daphnia magna
Source: Royal Society of Chemistry journal article supplement (doi:10.1039/c6en00391e), 2016-12-05
Supplement: c6en00391e1.pdf [file c6en00391e1.pdf]

## Support Information

### **Dependence of the Irradiation Conditions and Crystalline Phase of TiO<sub>2</sub> Nanoparticles on their Toxicity to *Daphnia magna***

Huiting Lu,<sup>a</sup> Wenhong Fan,<sup>\*a</sup> Haifeng Dong<sup>b</sup> and Lingling Liu<sup>a</sup>

<sup>a</sup> School of Space and Environment, Beihang University, Beijing 100191, P. R. China

<sup>b</sup> Research Center for Bioengineering and Sensing Technology, University of Science  
and Technology Beijing, Beijing 100083, P. R. China

Correspondence: Wenhong Fan, Department of Environmental Science and  
Engineering, School of Chemistry and Environment, Beihang University, Beijing  
100191, P. R. China. Tel.: +86 1082338630. Fax: +86 1082338630. E-mail:

[fanwh@buaa.edu.cn](mailto:fanwh@buaa.edu.cn)

---

### Calculation about the Valence Band Edge ( $E_v$ ) and the Conduction Band Edge ( $E_c$ ) of Each $\text{TiO}_2$ NPs Sample

The energy band gap ( $E_g$ ) is the energy interval between the valence band edge ( $E_v$ ) and the conduction band edge ( $E_c$ ). Hence, the relationship of  $E_g$ ,  $E_v$  and  $E_c$  is as follows:

$$E_g = E_v + E_c \quad (\text{S1})$$

Meanwhile, the relationship between the band edge energies ( $E_v$ ,  $E_c$ ) and the absolute electronegativity ( $\chi$ ) can be calculated according to the following equation<sup>1</sup>:

$$E_c = -\chi + 0.5 E_g \quad (\text{S2})$$

$$E_v = -\chi + 0.5 E_g \quad (\text{S3})$$

The absolute electronegativity of  $\text{TiO}_2$  is 5.81 eV. Then according to the value of  $E_g$ , the value of  $E_v$  and  $E_c$  can be calculated by equation S2 and S3.

---

**Table S1.** Zeta potential of TiO<sub>2</sub> nanoparticles.

---

| Sample | Zeta potential (mV) |
|--------|---------------------|
| A-S    | -1.5400             |
| M1     | -6.7000             |
| M2     | -6.1400             |
| M3     | -10.5000            |
| R-S    | -6.2900             |

---

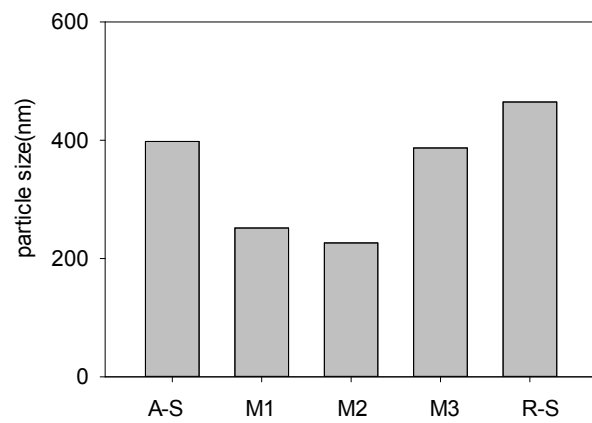

**Figure S1.** Average diameters of TiO<sub>2</sub> nanoparticles on the basis of the DLS data.

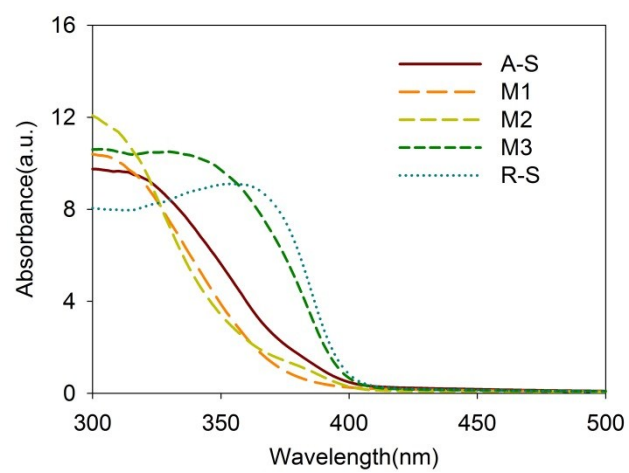

**Figure S2.** UV-visible spectra of the five TiO<sub>2</sub> nanoparticles.

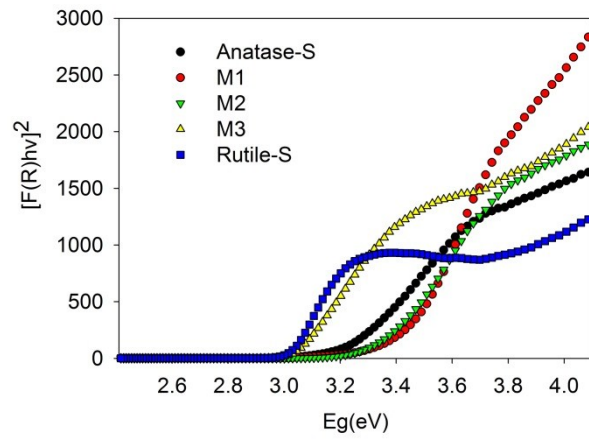

Figure S3: Band gap determination using Kubelka–Munk function of the five  $TiO_2$  nanoparticles.

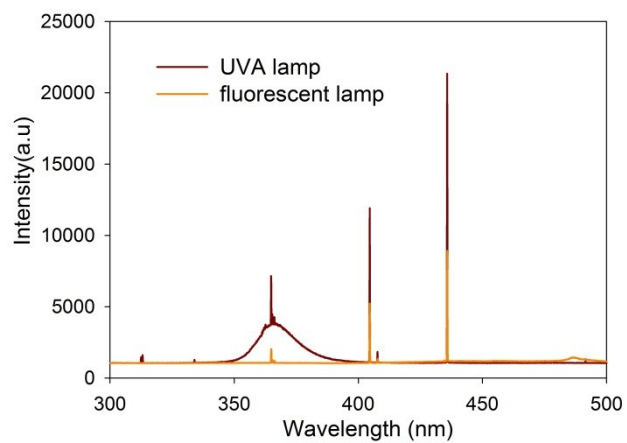

Figure S4. Emission spectra of the UVA lamp and fluorescent lamp.

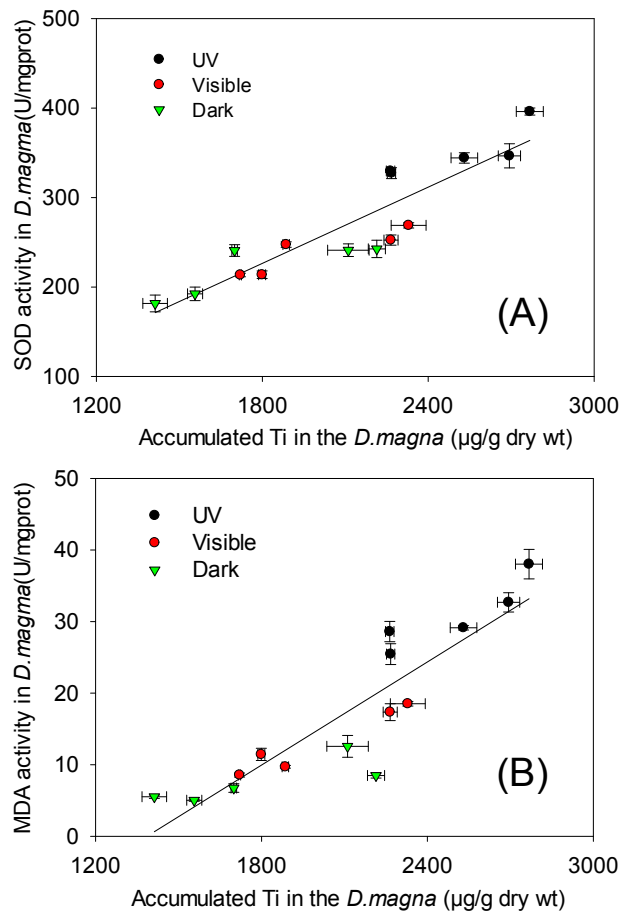

Figure S5. Relationship among SOD (A), MDA (B) and accumulated Ti in *D. magna* after 48 h of exposure to the five TiO<sub>2</sub> nanoparticles. Mean  $\pm$  standard deviation ( $n = 3$ ).



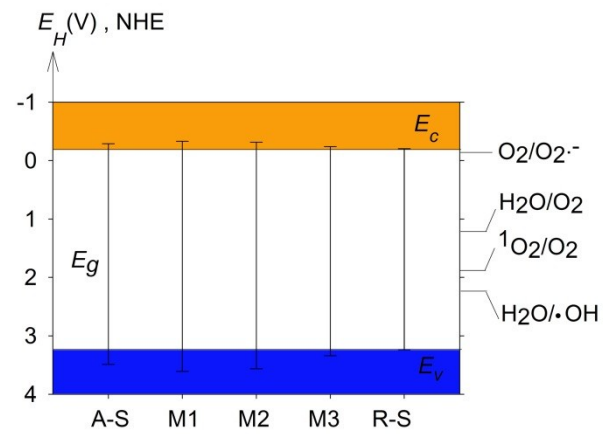

Figure S6. Band edge positions of the five TiO<sub>2</sub> nanoparticles in contact with an aqueous solution.

---

## REFERENCES

- S1. Y. Xu and M. A. A. Schoonen, *American Mineralogist*, 2000, **85**, 543-556.
